# Supplementary material
Source: publisher figshare collection journal article supplement (https://scielo.figshare.com/ndownloader/files/31698881)
Supplement: Supplementary file 1 [file 31698881]

# CARLOS ALFREDO JOLY IB/UNICAMP

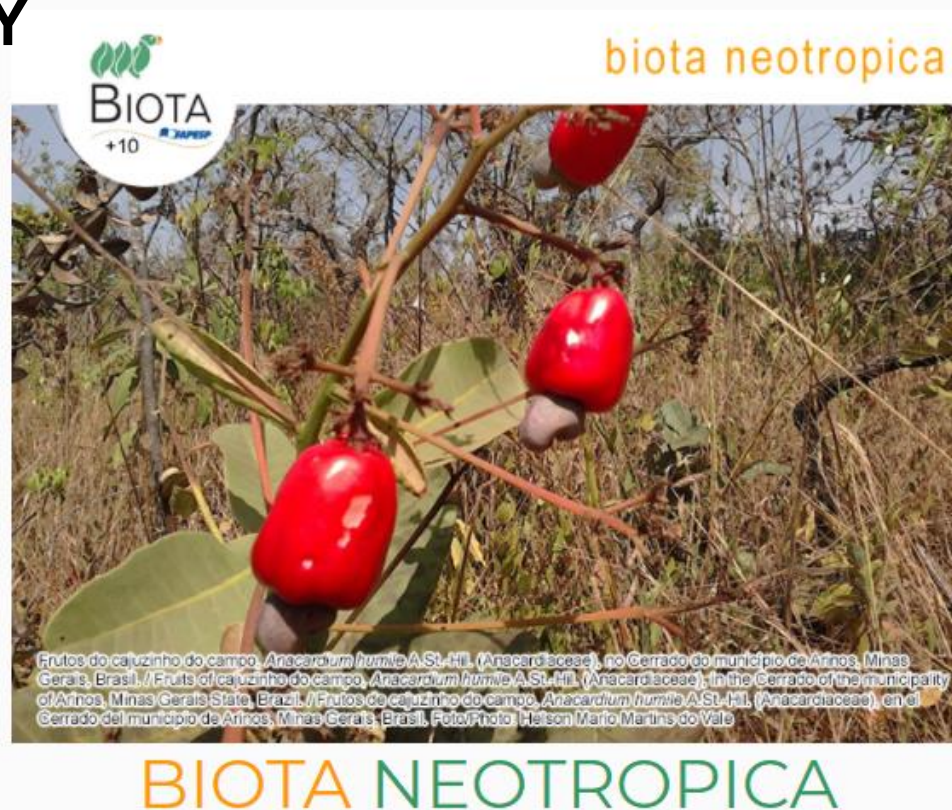

**Instituto Virtual da Biodiversidade  
Programa BIOTA/FAPESP**

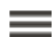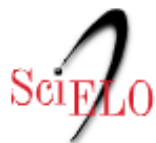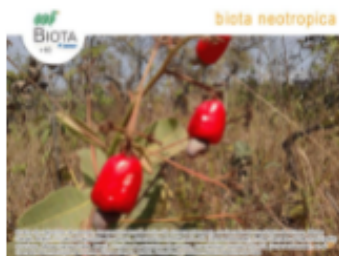

Open Access

## Biota Neotropica

Publication of: Instituto Virtual da Biodiversidade | BIOTA - FAPESP

Area: Biological Sciences

ISSN online version: 1676-0611

PORTUGUÊS ESPAÑOL

- Submission of manuscripts
- About the journal
- Editorial Board
- Instructions to authors

Journal homepage

all issues

« previous issue

current issue

next issue »

search

metrics

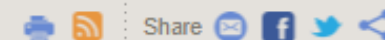

### Our Mission

To disseminate the results of original research work, concerned with characterization, conservation and sustainable use of biodiversity within the Neotropical region.

Most recent issue

**Biota Neotropica, Volume: 21, Issue: 4, Published: 2021**

<https://www.scielo.br/j/bn/>

### Latest articles

Dalechampia L.  
(Euphorbiaceae) in the  
Brazilian Amazon

Biota Neotropica,  
Volume: 21, Issue: 4,  
Published: 2021  
[Continue reading »](#)

Research trends on  
elasmobranchs from  
the Brazilian Amazon  
Coast: a four-decade  
review

Biota Neotropica,  
Volume: 21, Issue: 4,  
Published: 2021  
[Continue reading »](#)

Metabarcoding  
advances for ecology  
and biogeography of  
Neotropical protists:  
what do we know,  
where do we go?

Biota Neotropica,  
Volume: 21, Issue: 4,  
Published: 2021  
[Continue reading »](#)

Length-weight  
relationship and diet of  
the catfish *Cambeva*  
*guareiensis*  
(Siluriformes;  
Trichomycteridae)

Biota Neotropica,  
Volume: 21, Issue: 4,  
Published: 2021  
[Continue reading »](#)

Historical review on  
the type locality of  
*Knodus victoriae*  
(Steindachner 1907)  
(Teleostei:  
Characidae) and  
*Loricaria paraguayae*  
Steindachner 1907  
(Teleostei:...

Biota Neotropica,  
Volume: 21, Issue: 4,  
Published: 2021  
[Continue reading »](#)

Consequences of a  
new species and  
different stocks of  
Spiny Red Lobster in  
Brazil

Biota Neotropica,  
Volume: 21, Issue: 4,  
Published: 2021  
[Continue reading »](#)

The vascular flora  
of Porto Ferreira St  
Park: an ecotone  
in São Paulo State  
southeastern Brazil

Biota Neotropica,  
Volume: 21, Issue: 4,  
Published: 2021  
[Continue reading »](#)

## Instructions to authors

---

Manuscripts for publication in **Biota Neotropica** are to be submitted EXCLUSIVELY through the website <http://mc04.manuscriptcentral.com/bn-scielo> and must be prepared following the instructions below. After successful submission you will receive a confirmation email along with an ID number for your paper.

All subsequent correspondence should be sent to the Managing Editor at [ea@biotaneotropica.org.br](mailto:ea@biotaneotropica.org.br).

**Biota Neotropica**, together with [SciELO](#), is engaged in promoting Open Science and will gradually introduce new requirements to align its editorial policy with rules and procedures recommended by the principles of openness to the whole research cycle. **Therefore from 1st of January 2022, it becomes mandatory that data of all papers submitted to Biota Neotropica must be deposited and permanently archived in appropriate, trusted, domain-specific repositories that offer long-term preservation and persistent identifiers for the deposited dataset. Where no domain-specific data repository exists, authors should deposit their datasets in a general repository such as the Biota Neotropica Dataverse (<https://data.scielo.org/dataverse/brbn>), Zenod, Dryad, or others.**

## 2 - Data availability

Data are important products of the scientific enterprise, and they should be preserved and usable for decades in the future. Following the standard of international publications in the area of biodiversity, and after two years of keeping data availability as a recommendation, the Editorial Committee of **Biota Neotropica** decided that, from 1<sup>st</sup> of January 2022, as a condition for publication, all data supporting the results in papers published in the journal must be archived in an appropriate public archive offering open access and guaranteed preservation. Submissions will not be accepted without a link to the repository where the data has been deposited. Preferably data should be deposited in domain-specific data repositories, but authors are free to select other repositories such as the Biota Neotropica Dataverse (<https://data.scielo.org/dataverse/brbn>), Sistema de Informação Ambiental do Programa Biota/Fapesp/SinBiota, Dryad Digital Repository - Dryad, TreeBASE Web, GenBank, Figshare, Sistema de Informação sobre a Biodiversidade Brasileira/SiBBR or another repository that provides comparable access and guaranteed preservation. Data URL must be mentioned in the Data availability section of the manuscript.

When submitting the paper to Biota Neotropica the provisional URL of the dataset must be included in the Data availability section. The provisional URL shows that the data deposited is in a Draft Format and can be deleted if the paper is not accepted. For accepted papers the final URL of the data deposited must be included in the Data Availability section.



## General Guidelines for data publishing:

- Large primary biodiversity data sets (e.g., institutional collections of species-occurrence records) should be published with the [Sistema de Informação Ambiental do Programa Biota/Fapesp/SinBiota](#), [Sistema de Informação sobre a Biodiversidade Brasileira/SiBBR](#) or [GBIF Integrated Publishing Toolkit \(IPT\)](#);
- Gene sequence and genomic data should be deposited with [INSDC \(GenBank/EMBL/DDBJ\)](#), either directly or via a partnering repository, e.g. [Barcode of Life Data Systems \(BOLD\)](#). Transcriptomics data should be deposited in [Gene Expression Omnibus \(GEO\)](#) or [ArrayExpress](#).
- Phylogenetic data should be deposited at [TreeBASE](#).
- Biodiversity-related geoscience and environmental data should be deposited in [PANGAEA](#).
- Morphological images other than those presented in the article should be deposited at [Morphbank](#). Images of a specific kind should be deposited in appropriate repositories if these exist (e.g., [Morphosource](#) for MicroCT data).
- Videos should be uploaded to video sharing sites like [YouTube](#), [Vimeo](#) or [SciVee](#) and linked back to the article text. Similarly, audio files should go to platforms like [FreeSound](#) or [SoundCloud](#), and presentations to [Slideshare](#). In addition, multimedia files can also be uploaded as on the journal's Dataverse (<https://data.scielo.org/dataverse/brbn>).
- Other large data sets for which there is no existing thematic or domain-specific repository, could be deposited in the Biota Neotropica Dataverse (<https://data.scielo.org/dataverse/brbn>), [Dryad Data Repository](#), [Zenodo](#), either prior to or upon acceptance of the manuscript.
- All external data used in a journal paper must be cited in the reference list, and links to these data (as deposited in external repositories) must be included in the Data availability Section of the manuscript.
- Detailed instructions to deposit data in the Biota Neotropica SciELO Dataverse are available at <https://scielo.org/pt/sobre-o-scielo/scielo-data-pt/termos-data/> and [https://wp.scielo.org/wp-content/uploads/Guia-deposito\\_pt.pdf](https://wp.scielo.org/wp-content/uploads/Guia-deposito_pt.pdf)

## AUTHORS' CONTRIBUTIONS

**Journal of Ecology**

From January 2021 we're moving to online only format with 12 issues a year!

**Open Research****PEER REVIEW**

The peer review history for this article is available at  
<https://publons.com/publon/10.1111/1365-2745.13754> .

**DATA AVAILABILITY STATEMENT**

The data are available from the Dryad Digital Repository  
<https://doi.org/10.5061/dryad.jwstqjq94> (Ma et al., 2021 )

## OVERVIEW

ESA has adopted a society-wide Open Research Policy for its publications to further support scientific exploration and preservation, allow a full assessment of published research, and streamline policies across our family of journals. An open research policy provides full transparency for scientific data and code, facilitates replication and synthesis, and aligns ESA journals with current standards. As of 1 February 2021, all new manuscript submissions to ESA journals must abide by the following policy.

As a condition for publication in ESA journals, all underlying data and novel statistical code pertinent to the results presented in the publication must be made available in a permanent, publicly accessible data archive or repository upon acceptance of a manuscript,

**ECOLOGY**  
ECOLOGICAL SOCIETY OF AMERICA

Editor-in-Chief: Kathryn L. Cottingham

The COVID-19 pandemic impacts us locally and globally. We ask for your understanding that this unprecedented situation might lead to some delays. The production of all papers will continue but processing times are longer than usual.

Impact factor: 5.499

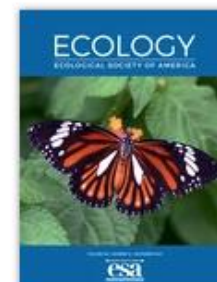

[LATEST ISSUE >](#)

Volume 102, Issue 12  
December 2021

## Data Availability

[PUBLISH](#)[ABOUT](#)[BROWSE](#)

The following policy applies to all PLOS journals

# PLOS ONE

### Introduction

PLOS journals require authors to make all data necessary to replicate their study's findings publicly available without restriction at the time of publication. When specific legal or ethical restrictions prohibit public sharing of a data set, authors must indicate how others may obtain access to the data.

When submitting a manuscript, authors must provide a Data Availability Statement describing compliance with PLOS' data policy. If the article is accepted for publication, the Data Availability Statement will be published as part of the article.

Acceptable data sharing methods are listed below, accompanied by guidance for authors as to what must be included in their Data Availability Statement and how to follow [best practices in research reporting](#).

PLOS believes that sharing data fosters scientific progress. Data availability allows and facilitates:

- › Validation, replication, reanalysis, new analysis, reinterpretation or inclusion into meta-analyses;
- › Reproducibility of research;
- › Efforts to ensure data are archived, increasing the value of the investment made in funding scientific research;
- › Reduction of the burden on authors in preserving and finding old data, and managing data access requests;
- › Citation and linking of research data and their associated articles, enhancing visibility and ensuring recognition for authors, data producers and curators.

Publication is conditional on compliance with this policy. If restrictions on access to data come to light after publication, we reserve the right to post a Correction, an Editorial Expression of Concern, contact the authors' institutions and funders, or, in extreme cases, retract the publication.



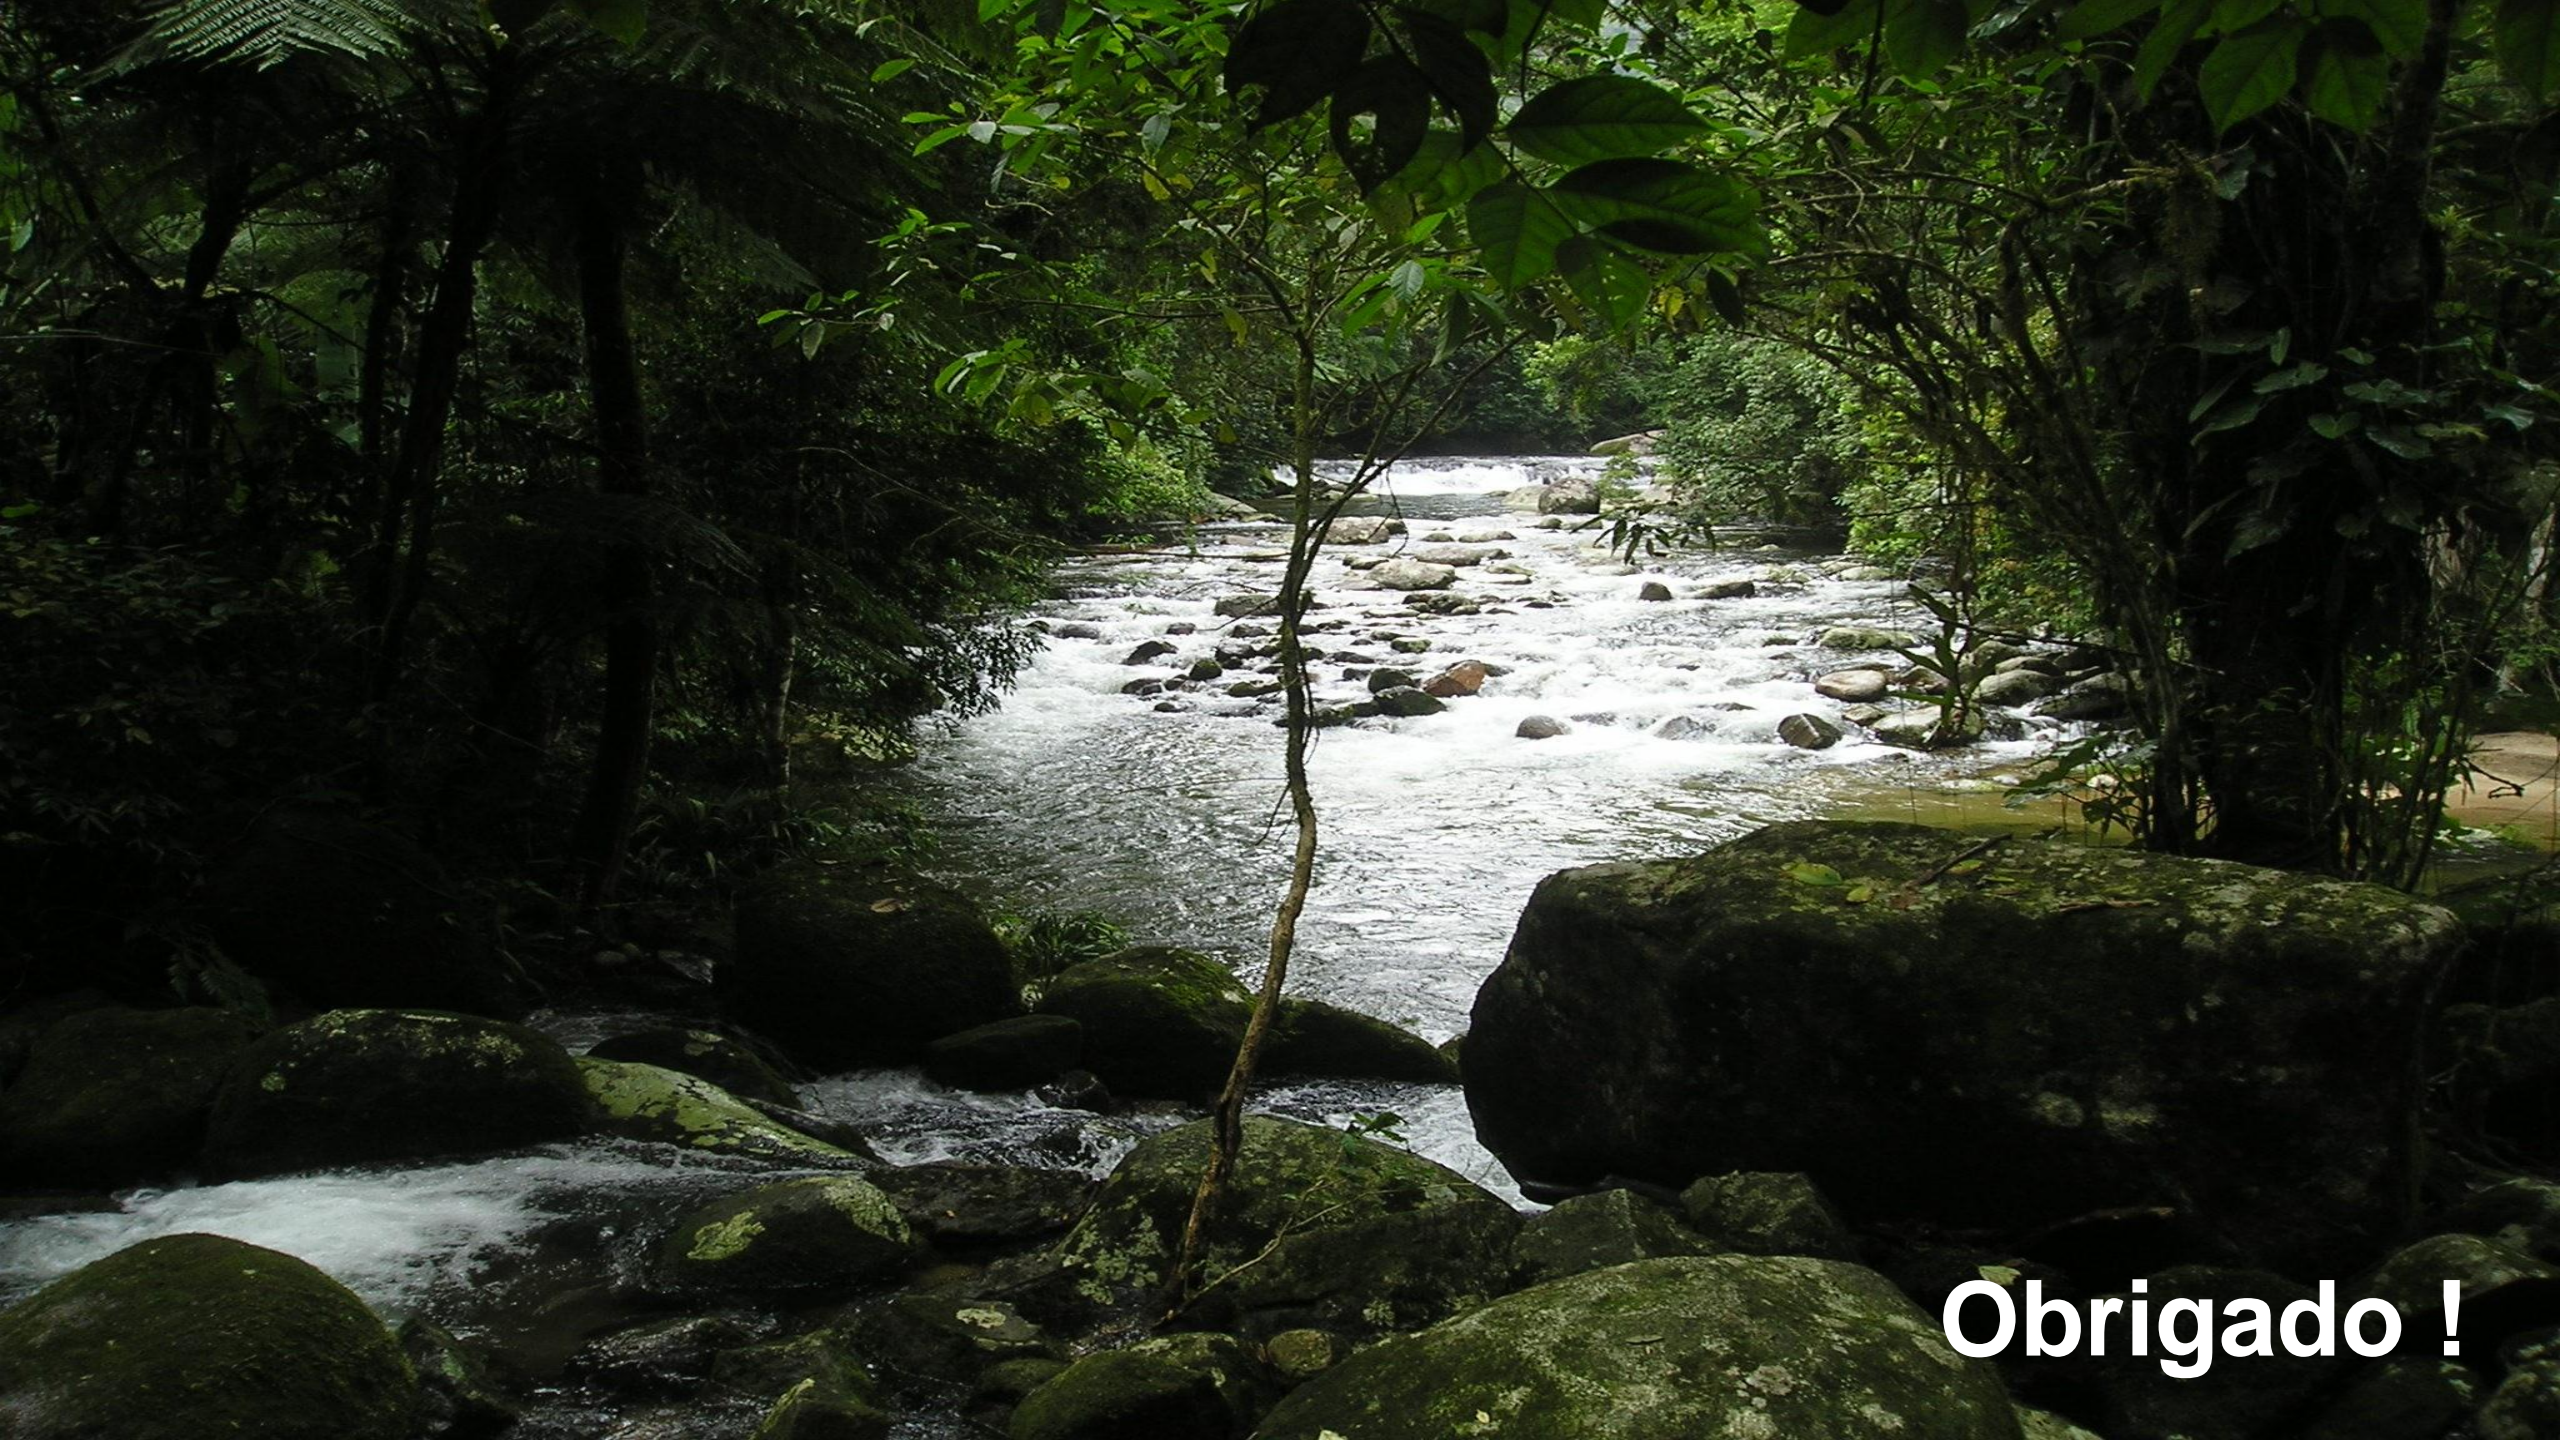

Obrigado !
